# Supplementary material
Source: MDPI journal article supplement (https://www.mdpi.com/2673-3943/2/2/13)
Supplement: s1 [file s1]

# Supplementary Materials: Letermovir for Cytomegalovirus Prophylaxis in Lung Transplant Patients with Valganciclovir-Induced Leukopenia

Arindam Singha, Pamela K. Burcham, April Logan, Zeinab El Boghdadly, Molly M. Howsare, David R. Nunley, Mark E. Lustberg and Brian C. Keller \*

**Table S1.** Detailed patient demographics.

| Patient | Age | Sex | Tx indication | Tx type | CMV status | Leukopenia episodes prior to LET | Median leukopenia duration (d) | WBC nadir (K/uL) | Time to leukopenia resolution after LET (d) | Indication for CMV prophylaxis w/ LET | LET start (POD) |
|---------|-----|-----|---------------|---------|------------|----------------------------------|--------------------------------|------------------|---------------------------------------------|---------------------------------------|-----------------|
| #1      | 27  | M   | CF            | BLT     | D+/R-      | 4                                | 7                              | 0.61             | 44                                          | Primary                               | 102             |
| #2      | 65  | F   | CF            | BLT     | D+/R-      | 5                                | 11                             | 0.62             | 9                                           | Secondary                             | 182             |
| #3      | 62  | F   | IPF           | BLT     | D+/R-      | 6                                | 21                             | 1.17             | 8                                           | Secondary                             | 279             |
| #4      | 54  | F   | IPF           | BLT     | D+/R+      | 4                                | 8                              | 1.03             | 6                                           | Primary                               | 99              |
| #5      | 63  | M   | IPF           | BLT     | D+/R-      | 2                                | 92.5                           | 0.94             | 33                                          | Primary                               | 294             |
| #6      | 65  | F   | IPF           | SLT     | D+/R-      | 7                                | 23                             | 1.24             | 38                                          | Secondary                             | 767             |
| #7      | 49  | M   | CF            | BLT     | D+/R-      | 2                                | 58                             | 1.10             | 10                                          | Primary                               | 321             |
| #8      | 62  | F   | COPD          | BLT     | D+/R-      | 4                                | 29.5                           | 1.48             | 7                                           | Secondary                             | 601             |
| #9      | 56  | F   | COPD          | BLT     | D-/R+      | 4                                | 23                             | 1.11             | 14                                          | Secondary                             | 219             |
| #10     | 68  | M   | IPF           | BLT     | D+/R-      | 4                                | 13                             | 2.00             | 8                                           | Primary                               | 185             |
| #11     | 68  | M   | IPF           | BLT     | D-/R+      | 1                                | 29                             | 1.10             | 13                                          | Primary                               | 77              |
| #12     | 64  | M   | COPD          | BLT     | D+/R-      | 4                                | 5                              | <0.30            | 5                                           | Secondary                             | 118             |
| #13     | 60  | F   | COPD          | SLT     | D+/R-      | 2                                | 136                            | 0.90             | 56                                          | Secondary                             | 515             |
| #14     | 60  | M   | CLAD          | BLT     | D-/R+      | 1                                | 34                             | 2.19             | 7                                           | Primary                               | 101             |
| #15     | 27  | M   | CF            | BLT     | D-/R+      | 1                                | 112                            | 0.90             | 34                                          | Primary                               | 154             |
| #16     | 62  | M   | IPF           | BLT     | D+/R+      | 2                                | 16.5                           | 0.59             | -6*                                         | Primary                               | 110             |
| #17     | 40  | M   | Sarcoidosis   | BLT     | D+/R-      | 1                                | 184                            | 1.40             | 77                                          | Secondary                             | 263             |

Leukopenia episodes were defined as WBC <4 K/uL on consecutive blood samples collected at least 1 day apart. Resolution of leukopenia was defined as WBC ≥ 4K/uL on two consecutive blood samples collected at least 1 day apart. BLT, bilateral lung transplant; CF, cystic fibrosis; CLAD, chronic lung allograft dysfunction; COPD, chronic obstructive pulmonary disease; IPF, idiopathic pulmonary fibrosis; LET, letermovir; LT, lung transplant; POD, post-operative day; SLT, single lung transplant; Tx, transplant. \* = Patient #16 had resolution of leukopenia 6 days prior to starting letermovir.

**Table S2.** Repeated Measures Mixed Model.

| Description | Parameter                                  | Parameter Estimate | p-value |
|-------------|--------------------------------------------|--------------------|---------|
| Intercepts  | Valganciclovir                             | 9.20               | 0.0449  |
|             | Letermovir                                 | 7.51               |         |
| Slopes      | Days Post-Transplant for No Letermovir Yet | -0.0113            | <0.0001 |
|             | Days Post-Transplant for Letermovir        | -0.0043            |         |

**Table S3.** Laboratory values and filgrastim doses measured or administered before and after letermovir.

| Patient # | WBC Pre<br>(K/uL) | WBC Post<br>(K/uL) | SCr Pre<br>(mg/dL) | SCr Post<br>(mg/dL) | Tacrolimus<br>Pre (ng/mL) | Tacrolimus<br>Post (ng/mL) | Filgrastim<br>doses Pre | Filgrastim<br>doses Post |
|-----------|-------------------|--------------------|--------------------|---------------------|---------------------------|----------------------------|-------------------------|--------------------------|
| 1         | 3.43              | 3.05               | 1.55               | 2.30                | 8.20                      | 9.20                       | 8                       | 2                        |
| 2         | 2.86              | 4.24               | 0.98               | 0.98                | 8.00                      | 7.90                       | 3                       | 0                        |
| 3         | 3.06              | 4.85               | 2.15               | 1.85                | 5.40                      | 4.60                       | 1                       | 0                        |
| 4         | 2.61              | 4.76               | 0.62               | 0.65                | 10.45                     | 10.40                      | 11                      | 0                        |
| 5         | 2.00              | 4.60               | 4.40               | 3.57                | 9.70                      | 5.25                       | 6                       | 0                        |
| 6         | 4.70              | 6.05               | 1.50               | 2.45                | 7.80                      | 14.45                      | 3                       | 0                        |
| 7         | 2.20              | 7.55               | 1.25               | 1.20                | 10.18                     | 7.70                       | 2                       | 0                        |
| 8         | 5.00              | 7.71               | 1.51               | 1.35                | 6.70                      | 9.60                       | 5                       | 0                        |
| 9         | 1.60              | 2.90               | 2.29               | 1.90                | 11.90                     | 5.00                       | 17                      | 0                        |
| 10        | 4.24              | 8.47               | 1.66               | 1.65                | 8.30                      | 9.10                       | 0                       | 0                        |
| 11        | 4.60              | 4.48               | 1.00               | 0.96                | 11.35                     | 11.40                      | 0                       | 2                        |
| 12        | 4.80              | 7.77               | 1.12               | 0.97                | 7.60                      | 8.60                       | 9                       | 7                        |
| 13        | 2.80              | 4.50               | 1.48               | 1.21                | 7.50                      | 3.50                       | 6                       | 0                        |
| 14        | 4.59              | 5.91               | 2.28               | 3.60                | 7.65                      | 7.80                       | 0                       | 2                        |
| 15        | 1.19              | 5.20               | 1.10               | 1.25                | 12.00                     | 9.55                       | 4                       | 0                        |
| 16        | 2.62              | 5.57               | 1.16               | 1.27                | 8.80                      | 10.60                      | 8                       | 0                        |
| 17        | 2.42              | 3.09               | 1.00               | 1.22                | 8.50                      | 15.20                      | 0                       | 0                        |

WBC significantly increased following letermovir initiation (3.15 K/uL pre-letermovir vs. 5.46 K/uL post-letermovir,  $p < 0.0001$ ). There was no significant change in SCr or tacrolimus trough level after starting letermovir ( $p = 0.56$  and  $0.48$ , respectively). Mean number of filgrastim administrations required to maintain normal WBC levels were significantly lower following initiation of letermovir (4.88 doses pre-letermovir vs. 0.76 doses post-letermovir,  $p = 0.003$ ). SCr, serum creatinine.

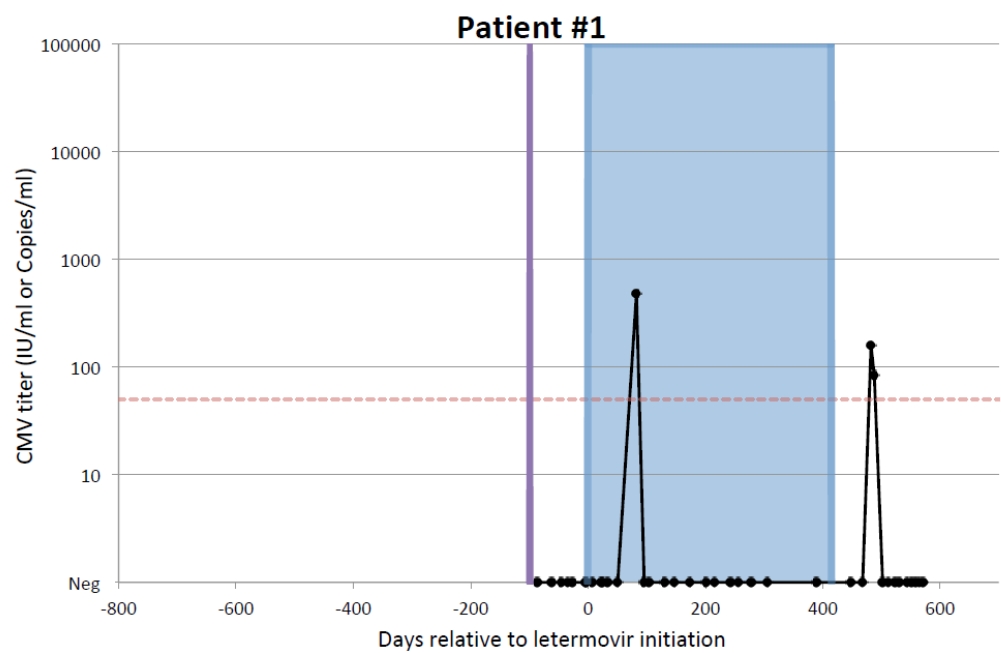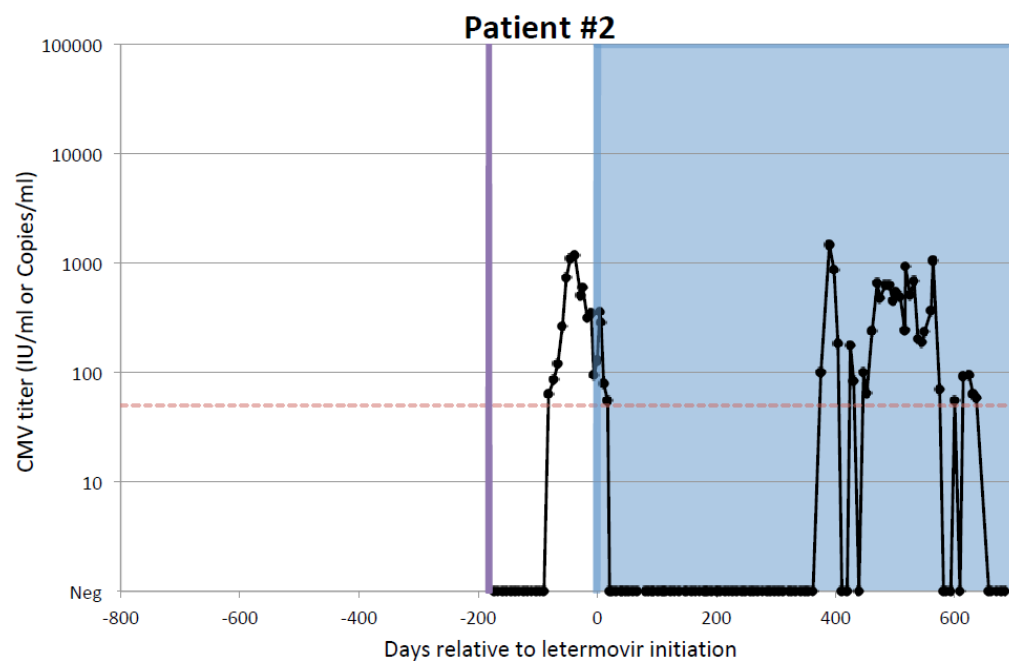

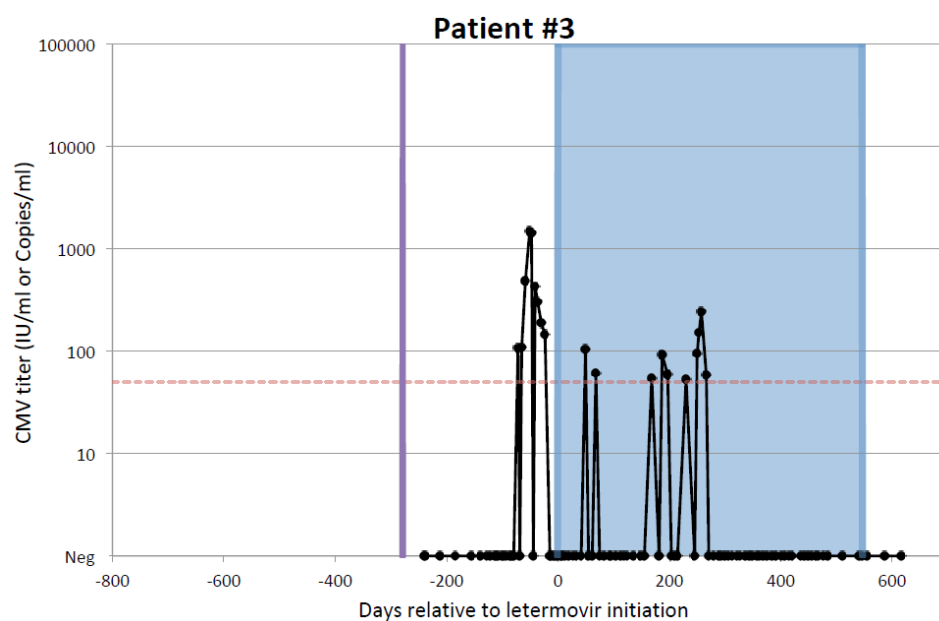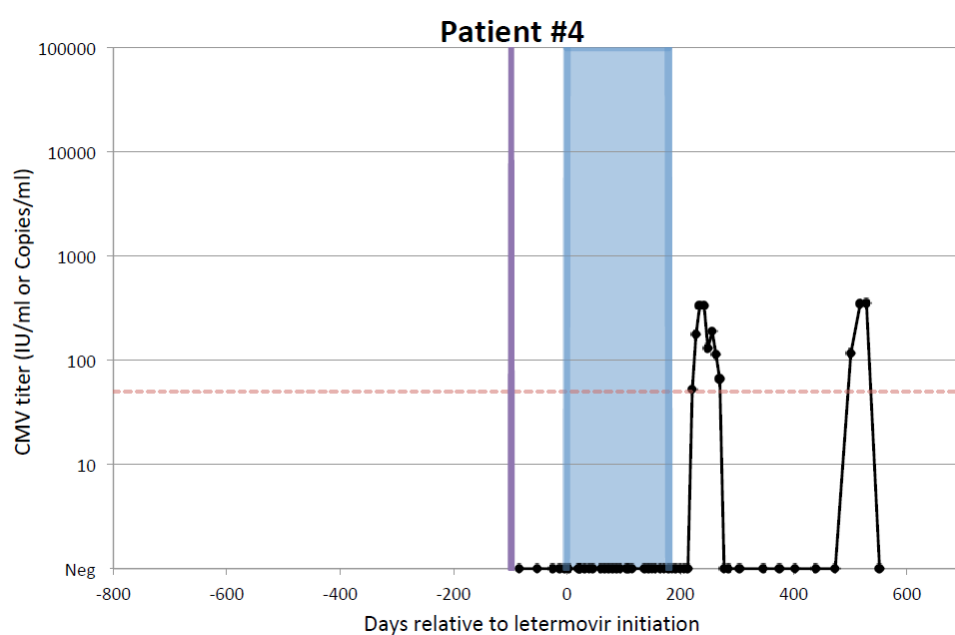

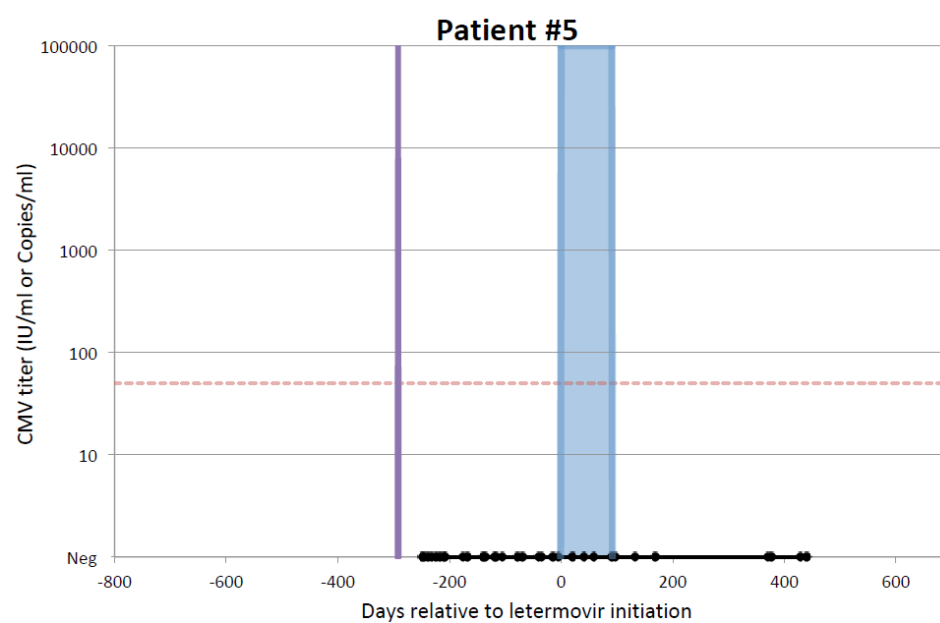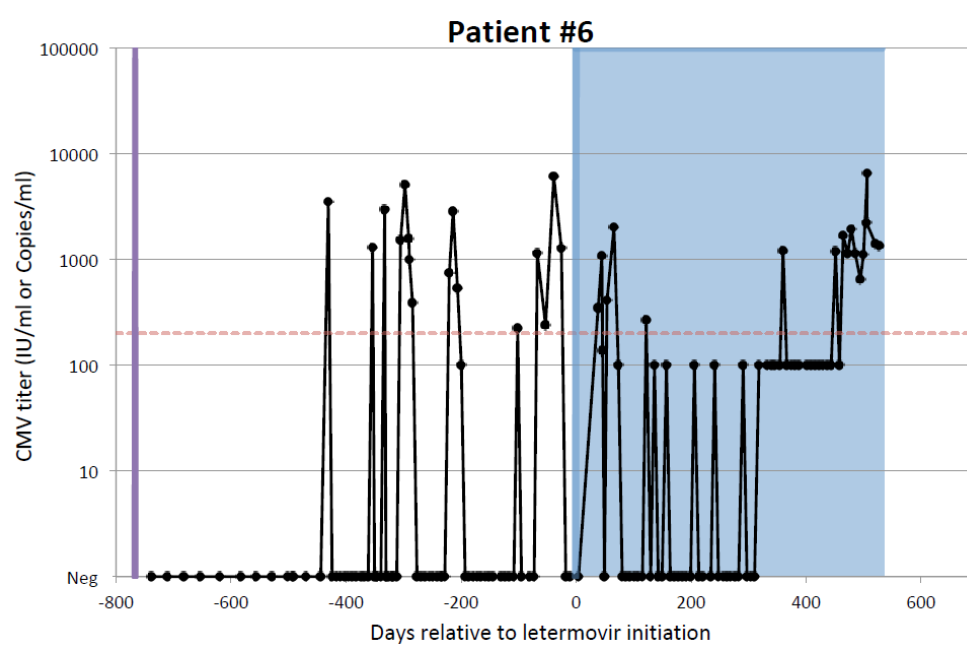

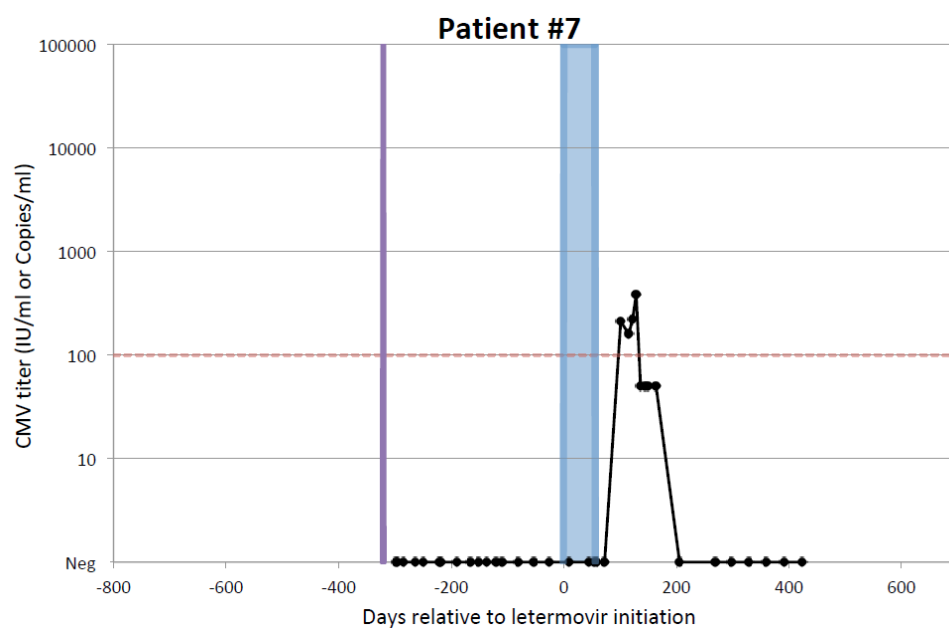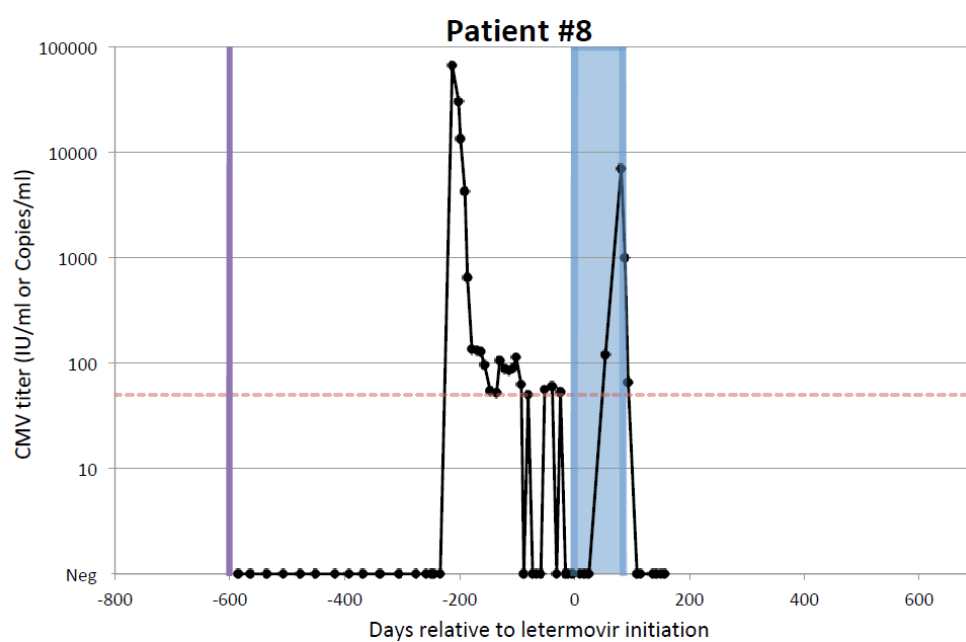

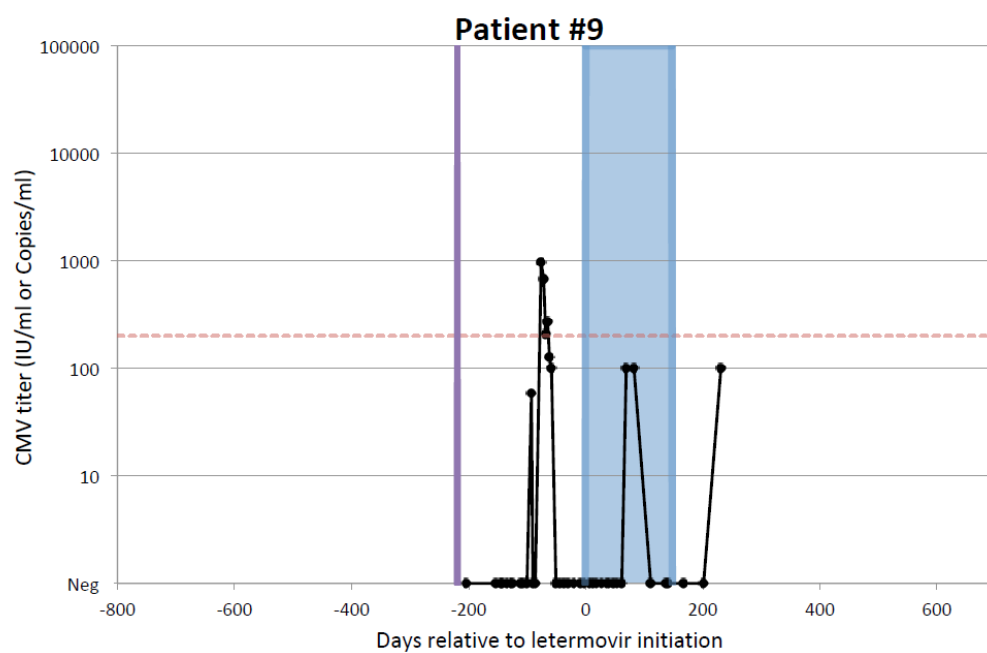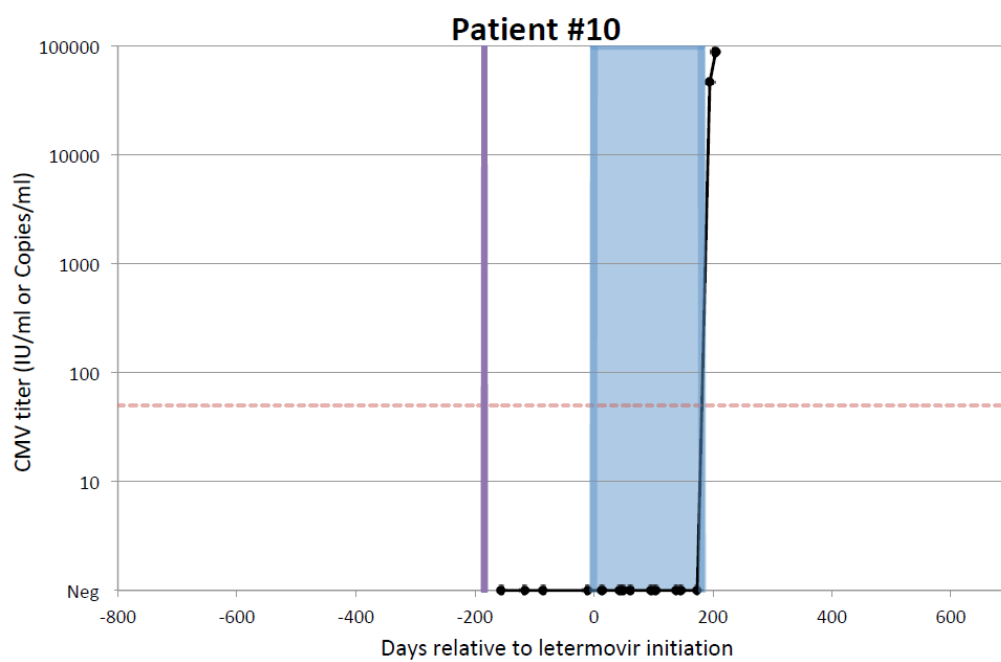

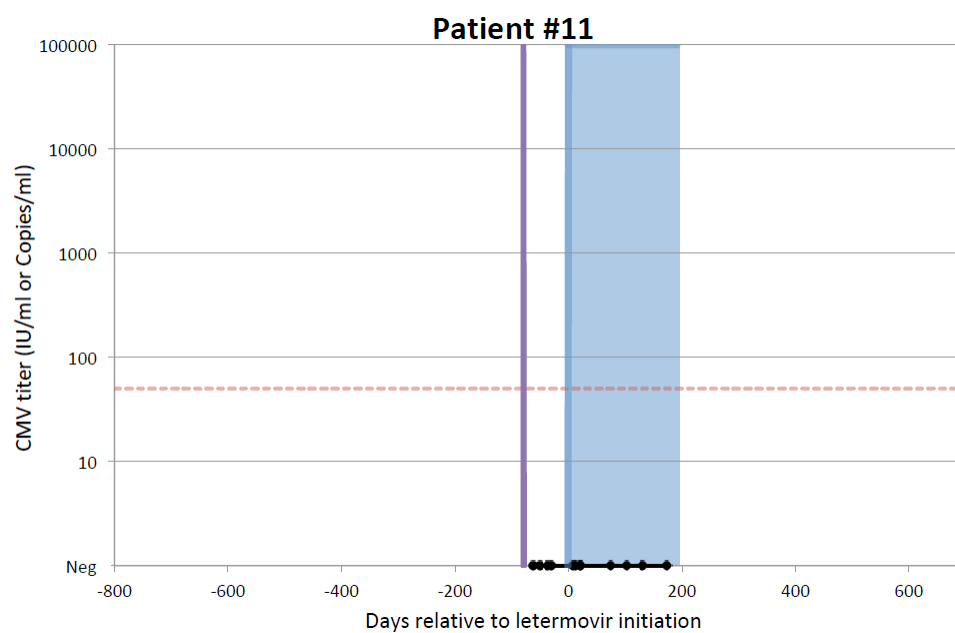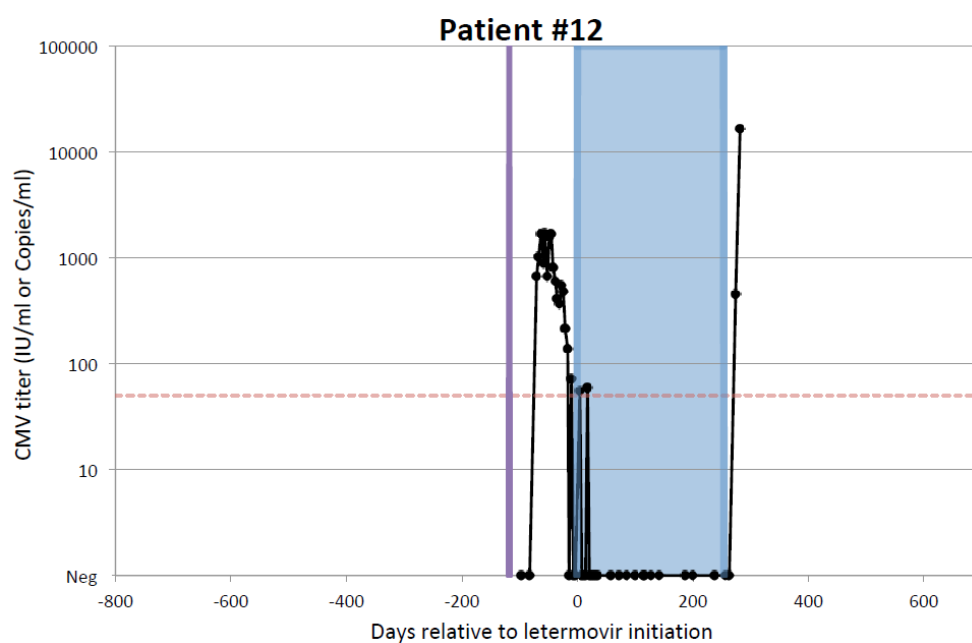



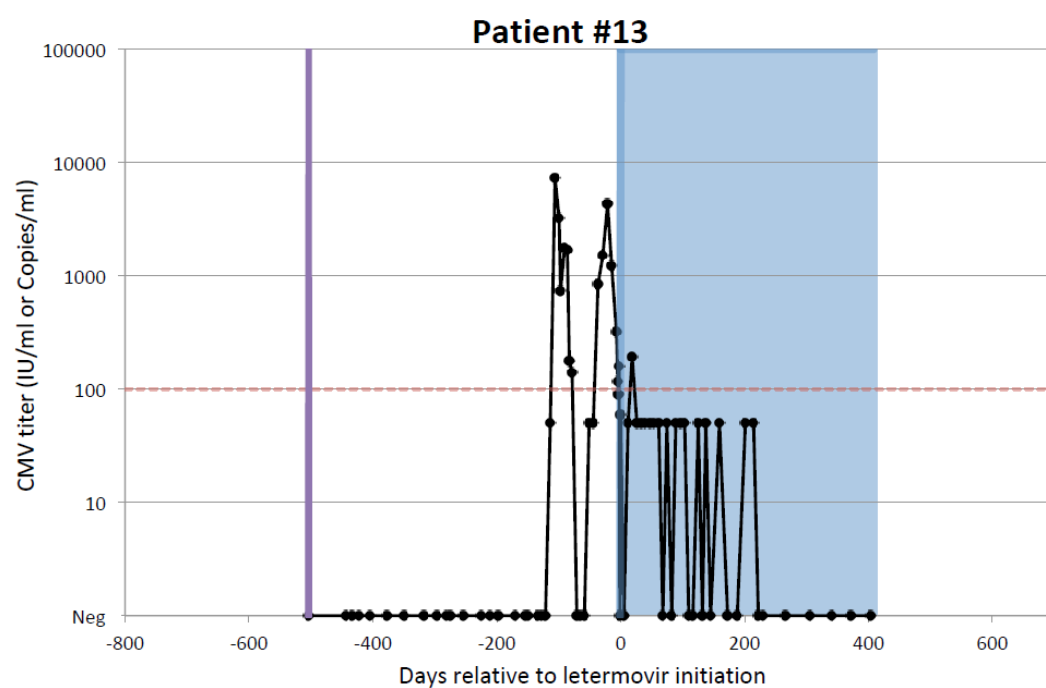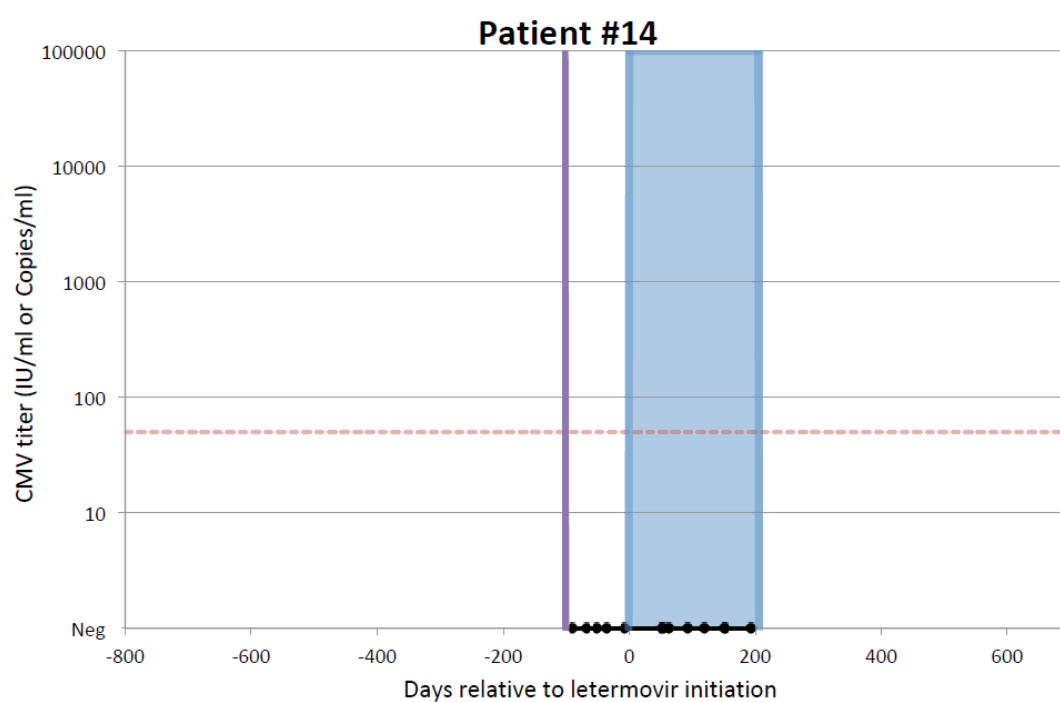

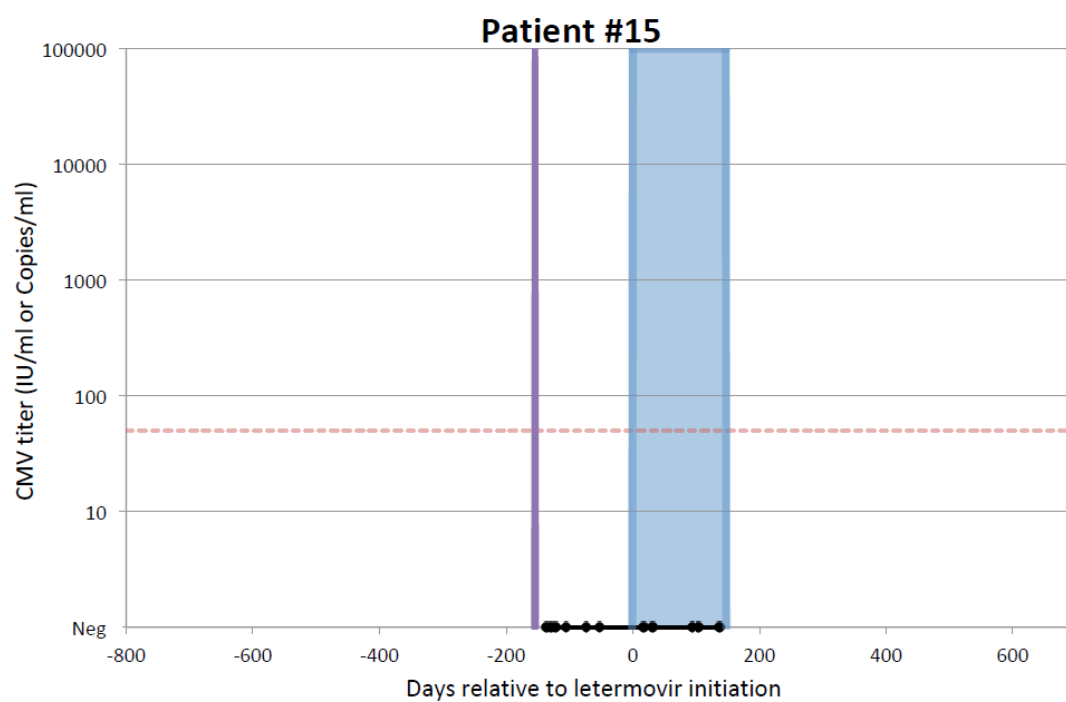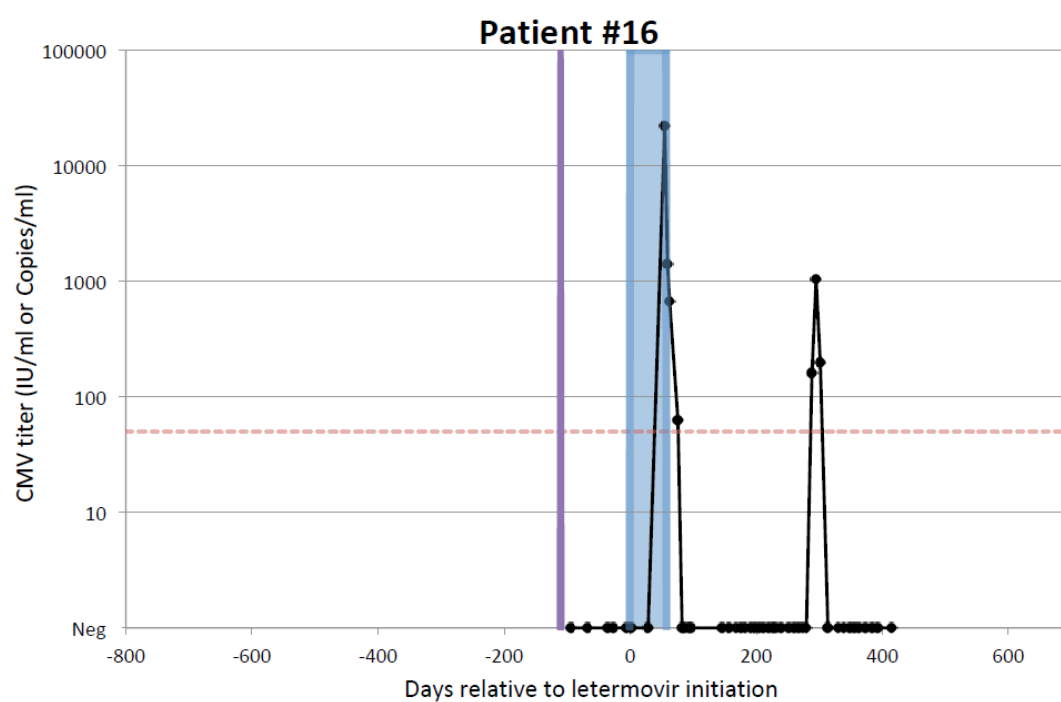

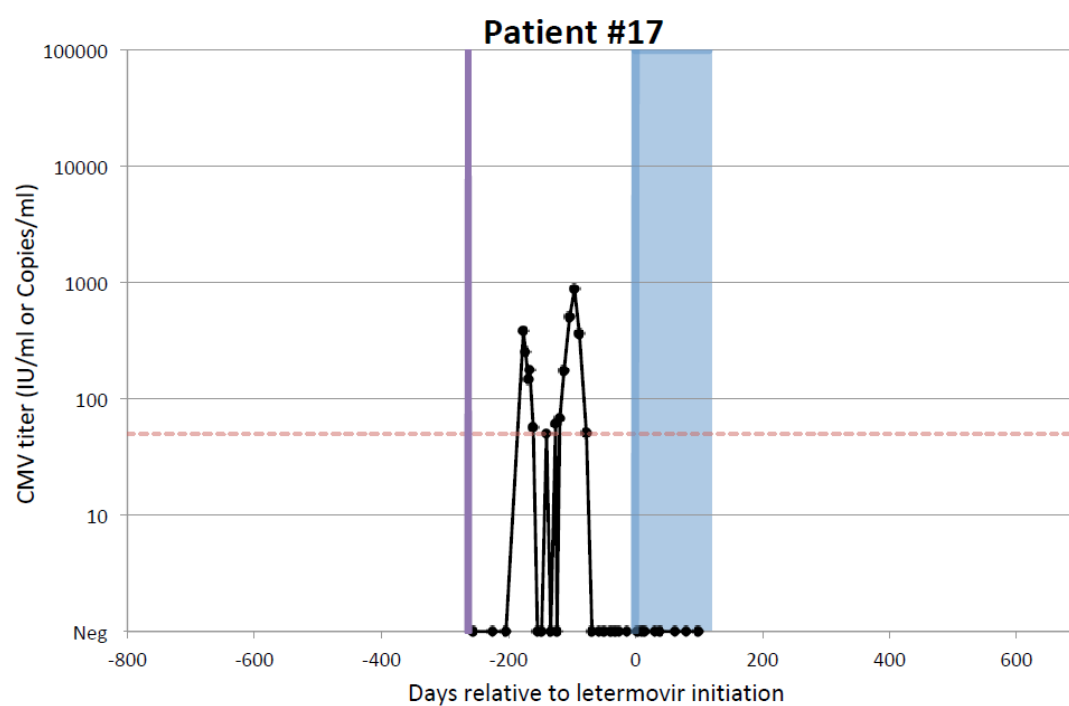

**Figure S1.** Patient-specific plots of CMV DNAemia from time of transplant through end of study period.
